# Supplementary material
Source: PubMed Central journal article supplement (PMC6583325)
Supplement: jamadermatol-154-1394-s001.pdf [file jamadermatol-154-1394-s001.pdf]

## Supplementary Online Content

Li S, Chen ML, Drucker AM, et al. Association of caffeine intake and caffeinated coffee consumption with risk of incident rosacea in women. *JAMA Dermatol*. Published online October 17, 2018. doi:10.1001/jamadermatol.2018.3301

**eTable 1:** Age- and multivariate-adjusted hazard ratios for rosacea by tea, soda, and chocolate in the Nurses' Health Study II (1991–2005)

**eTable 2:** Association between caffeine intake and rosacea stratified by smoking status in the Nurses' Health Study II (1991–2005)

**eTable 3:** Association between caffeine intake and rosacea stratified by alcohol intake in the Nurses' Health Study II (1991–2005)

**eTable 4:** Association between caffeine intake and rosacea stratified by body mass index in the Nurses' Health Study II (1991–2005)

**eTable 5:** Association between caffeine intake and rosacea stratified by physical activity in the Nurses' Health Study II (1991–2005)

**eFigure 1:** Dose-response hazard ratio (with 95%CI) of incident rosacea by caffeine intake.

**eTable 1. Age- and multivariate-adjusted hazard ratios for rosacea by tea, soda, and chocolate in the Nurses' Health Study II (1991–2005)**

|                                   | No. of Case | No. of Person-Years | Crude Incidence Rate (/100,000 Person-Years) | Age-adjusted Incidence Rate <sup>c</sup> (/100,000 Person-Years) | Age-Adjusted |                 | Multivariate-Adjusted <sup>a</sup> |                 |  |
|-----------------------------------|-------------|---------------------|----------------------------------------------|------------------------------------------------------------------|--------------|-----------------|------------------------------------|-----------------|--|
|                                   |             |                     |                                              |                                                                  | HR           | 95% CI          | HR                                 | 95% CI          |  |
| <b>Caffeinated tea, servings</b>  |             |                     |                                              |                                                                  |              |                 |                                    |                 |  |
| <1/mo                             | 1,110       | 283,499             | 392                                          | 439                                                              | <b>1.00</b>  | <b>referent</b> | <b>1.00</b>                        | <b>referent</b> |  |
| 1/mo to 4/wk                      | 2,327       | 494,849             | 470                                          | 488                                                              | 1.08         | 1.00, 1.16      | 1.05                               | 0.97, 1.12      |  |
| 5-7/wk                            | 622         | 151,213             | 411                                          | 456                                                              | 1.03         | 0.93, 1.14      | 1.01                               | 0.92, 1.12      |  |
| 2-3/d                             | 754         | 158,023             | 477                                          | 493                                                              | 1.11         | 1.01, 1.22      | 1.07                               | 0.98, 1.17      |  |
| ≥4/d                              | 132         | 32,467              | 407                                          | 443                                                              | 1.07         | 0.89, 1.28      | 1.06                               | 0.89, 1.27      |  |
| P <sub>trend</sub>                |             |                     |                                              |                                                                  | 0.18         |                 | 0.30                               |                 |  |
| <b>Caffeinated soda, servings</b> |             |                     |                                              |                                                                  |              |                 |                                    |                 |  |
| <1/mo                             | 896         | 212,058             | 423                                          | 449                                                              | <b>1.00</b>  | <b>referent</b> | <b>1.00</b>                        | <b>referent</b> |  |
| 1/mo to 4/wk                      | 3,144       | 699,070             | 450                                          | 478                                                              | 1.00         | 0.92, 1.07      | 0.95                               | 0.88, 1.03      |  |
| 5-7/wk                            | 410         | 83,998              | 488                                          | 485                                                              | 0.92         | 0.82, 1.04      | 0.85                               | 0.75, 0.95      |  |
| 2-3/d                             | 484         | 120,534             | 402                                          | 470                                                              | 0.96         | 0.86, 1.07      | 0.91                               | 0.82, 1.02      |  |
| ≥4/d                              | 11          | 4,390               | 251                                          | 208                                                              | 0.73         | 0.40, 1.32      | 0.79                               | 0.43, 1.43      |  |
| P <sub>trend</sub>                |             |                     |                                              |                                                                  | 0.19         |                 | 0.08                               |                 |  |
| <b>Chocolate, servings</b>        |             |                     |                                              |                                                                  |              |                 |                                    |                 |  |
| <1/mo                             | 797         | 212,091             | 376                                          | 420                                                              | <b>1.00</b>  | <b>referent</b> | <b>1.00</b>                        | <b>referent</b> |  |
| 1/mo to 4/wk                      | 3,926       | 862,081             | 455                                          | 481                                                              | 1.08         | 1.00, 1.16      | 1.02                               | 0.94, 1.10      |  |
| 5-7/wk                            | 191         | 40,737              | 469                                          | 533                                                              | 1.21         | 1.03, 1.42      | 1.17                               | 1.00, 1.37      |  |
| ≥2/d <sup>b</sup>                 | 31          | 5,142               | 603                                          | 616                                                              | 1.31         | 0.91, 1.87      | 1.31                               | 0.91, 1.87      |  |
| P <sub>trend</sub>                |             |                     |                                              |                                                                  | 0.005        |                 | 0.04                               |                 |  |

Abbreviations: CI, confidence interval; HR, hazard ratio.

<sup>a</sup> Adjusted for age (continuous variable), race (non-Hispanic white, African-American, Asian, or other race), postmenopausal hormone use (premenopause, never, current or past users), alcohol drinking (none, <4.9, 5.0–9.9, 10–14.9, 15–29.9, or ≥30.0 g/day), smoking status (never smokers, past smokers 1-4, past smokers 5-14, past smokers 15-24, past smokers ≥25, current smokers 1-4, current smokers 5-14, current smokers 15-24, current smokers ≥25 cigarettes/day), body mass index (continuous variable), and physical activity (metabolic equivalent in quintiles, h/wk).

<sup>b</sup> The category of “≥4 servings/d” has been combined with the category of “2-3 servings /d” as number of cases are zero for the category of “≥4 servings/d”.

<sup>c</sup> The incidence rate of rosacea adjusted to the age distribution in the Nurses’ Health Study II.

**eTable 2. Association between caffeine intake and rosacea stratified by smoking status in the Nurses' Health Study II (1991–2005)**

|                                | No. of Case | No. of Person-Years | Age-Adjusted |                 | Multivariate-Adjusted <sup>a</sup> |                 |
|--------------------------------|-------------|---------------------|--------------|-----------------|------------------------------------|-----------------|
|                                |             |                     | HR           | 95% CI          | HR                                 | 95% CI          |
| <b>Never smokers</b>           |             |                     |              |                 |                                    |                 |
| Quintile 1 ( $\leq 46$ )       | 659         | 158,051             | <b>1.00</b>  | <b>referent</b> | <b>1.00</b>                        | <b>referent</b> |
| Quintile 2 (47-133)            | 849         | 188,131             | 1.01         | 0.91, 1.11      | 0.95                               | 0.86, 1.05      |
| Quintile 3 (134-233)           | 688         | 149,448             | 1.03         | 0.93, 1.15      | 0.96                               | 0.87, 1.07      |
| Quintile 4 (234-410)           | 678         | 148,856             | 0.98         | 0.88, 1.09      | 0.89                               | 0.80, 1.00      |
| Quintile 5 ( $\geq 411$ )      | 338         | 91,005              | 0.89         | 0.78, 1.02      | 0.82                               | 0.71, 0.93      |
| <b>Past smokers</b>            |             |                     |              |                 |                                    |                 |
| Quintile 1 ( $\leq 46$ )       | 167         | 27,856              | <b>1.00</b>  | <b>referent</b> | <b>1.00</b>                        | <b>referent</b> |
| Quintile 2 (47-133)            | 225         | 42,289              | 0.81         | 0.66, 0.99      | 0.78                               | 0.64, 0.96      |
| Quintile 3 (134-233)           | 277         | 51,649              | 0.81         | 0.67, 0.99      | 0.78                               | 0.64, 0.95      |
| Quintile 4 (234-410)           | 441         | 82,562              | 0.79         | 0.66, 0.94      | 0.74                               | 0.61, 0.88      |
| Quintile 5 ( $\geq 411$ )      | 284         | 63,059              | 0.72         | 0.59, 0.87      | 0.69                               | 0.57, 0.83      |
| <b>Current smokers</b>         |             |                     |              |                 |                                    |                 |
| Quintile 1 ( $\leq 46$ )       | 22          | 6,313               | <b>1.00</b>  | <b>referent</b> | <b>1.00</b>                        | <b>referent</b> |
| Quintile 2 (47-133)            | 36          | 11,672              | 0.83         | 0.49, 1.41      | 0.80                               | 0.47, 1.37      |
| Quintile 3 (134-233)           | 56          | 16,637              | 0.89         | 0.54, 1.46      | 0.86                               | 0.52, 1.41      |
| Quintile 4 (234-410)           | 101         | 30,342              | 0.85         | 0.53, 1.35      | 0.80                               | 0.50, 1.27      |
| Quintile 5 ( $\geq 411$ )      | 113         | 48,756              | 0.63         | 0.40, 0.99      | 0.61                               | 0.38, 0.96      |
| <b>P<sub>interaction</sub></b> |             |                     | 0.37         |                 |                                    |                 |

Abbreviations: CI, confidence interval; HR, hazard ratio.

<sup>a</sup> Adjusted for age (continuous variable), race (non-Hispanic white, African-American, Asian, or other race), postmenopausal hormone use (premenopause, never, current or past users), alcohol drinking (none, <4.9, 5.0–9.9, 10–14.9, 15–29.9, or  $\geq 30.0$  g/day), body mass index (continuous variable), and physical activity (metabolic equivalent in quintiles, h/wk).

**eTable 3. Association between caffeine intake and rosacea stratified by alcohol intake in the Nurses' Health Study II (1991–2005)**

|                                                     | No. of Case | No. of Person-Years | Age-Adjusted |                 | Multivariate-Adjusted <sup>a</sup> |                 |
|-----------------------------------------------------|-------------|---------------------|--------------|-----------------|------------------------------------|-----------------|
|                                                     |             |                     | HR           | 95% CI          | HR                                 | 95% CI          |
| <b>Never drinker</b>                                |             |                     |              |                 |                                    |                 |
| Quintile 1 ( $\leq 46$ )                            | 436         | 10,4890             | <b>1.00</b>  | <b>referent</b> | <b>1.00</b>                        | <b>referent</b> |
| Quintile 2 (47-133)                                 | 456         | 107,044             | 0.95         | 0.83, 1.08      | 0.92                               | 0.80, 1.05      |
| Quintile 3 (134-233)                                | 347         | 76,406              | 1.03         | 0.89, 1.18      | 0.99                               | 0.86, 1.14      |
| Quintile 4 (234-410)                                | 292         | 71,200              | 0.89         | 0.77, 1.03      | 0.86                               | 0.74, 1.00      |
| Quintile 5 ( $\geq 411$ )                           | 188         | 58,513              | 0.76         | 0.64, 0.91      | 0.76                               | 0.64, 0.91      |
| <b>0g/d&lt; Alcohol intake amount &lt;5g/d</b>      |             |                     |              |                 |                                    |                 |
| Quintile 1 ( $\leq 46$ )                            | 278         | 53,845              | <b>1.00</b>  | <b>referent</b> | <b>1.00</b>                        | <b>referent</b> |
| Quintile 2 (47-133)                                 | 420         | 81,278              | 0.94         | 0.81, 1.09      | 0.92                               | 0.79, 1.07      |
| Quintile 3 (134-233)                                | 350         | 77,332              | 0.84         | 0.71, 0.98      | 0.83                               | 0.70, 0.97      |
| Quintile 4 (234-410)                                | 412         | 92,429              | 0.79         | 0.68, 0.92      | 0.79                               | 0.67, 0.92      |
| Quintile 5 ( $\geq 411$ )                           | 246         | 71,941              | 0.67         | 0.56, 0.79      | 0.69                               | 0.58, 0.82      |
| <b>Alcohol intake amount <math>\geq 5g/d</math></b> |             |                     |              |                 |                                    |                 |
| Quintile 1 ( $\leq 46$ )                            | 95          | 17,389              | <b>1.00</b>  | <b>referent</b> | <b>1.00</b>                        | <b>referent</b> |
| Quintile 2 (47-133)                                 | 190         | 34,448              | 0.9          | 0.70, 1.15      | 0.89                               | 0.70, 1.14      |
| Quintile 3 (134-233)                                | 274         | 45,706              | 0.99         | 0.78, 1.25      | 0.98                               | 0.78, 1.24      |
| Quintile 4 (234-410)                                | 464         | 77,644              | 0.97         | 0.78, 1.21      | 0.95                               | 0.76, 1.19      |
| Quintile 5 ( $\geq 411$ )                           | 253         | 53,414              | 0.86         | 0.68, 1.09      | 0.86                               | 0.68, 1.09      |
| $P_{\text{interaction}}$                            |             |                     | 0.13         |                 |                                    |                 |

Abbreviations: CI, confidence interval; HR, hazard ratio.

<sup>a</sup> Adjusted for age (continuous variable), race (non-Hispanic white, African-American, Asian, or other race), postmenopausal hormone use (premenopause, never, current or past users), smoking status (never smokers, past smokers 1-4, past smokers 5-14, past smokers 15-24, past smokers  $\geq 25$ , current smokers 1-4, current smokers 5-14, current smokers 15-24, current smokers  $\geq 25$  cigarettes/day), body mass index (continuous variable), and physical activity (metabolic equivalent in quintiles, h/wk).

**eTable 4. Association between caffeine intake and rosacea stratified by body mass index in the Nurses' Health Study II (1991–2005)**

|                                | No. of Case | No. of Person-Years | Age-Adjusted |                 | Multivariate-Adjusted <sup>a</sup> |                 |
|--------------------------------|-------------|---------------------|--------------|-----------------|------------------------------------|-----------------|
|                                |             |                     | HR           | 95% CI          | HR                                 | 95% CI          |
| <b>10&lt;BMI&lt;25</b>         |             |                     |              |                 |                                    |                 |
| Quintile 1 (≤46)               | 456         | 116,985             | <b>1.00</b>  | <b>referent</b> | <b>1.00</b>                        | <b>referent</b> |
| Quintile 2 (47-133)            | 528         | 133,448             | 0.96         | 0.84, 1.08      | 0.91                               | 0.80, 1.03      |
| Quintile 3 (134-233)           | 506         | 122,820             | 0.99         | 0.87, 1.12      | 0.91                               | 0.80, 1.04      |
| Quintile 4 (234-410)           | 625         | 149,307             | 0.97         | 0.86, 1.09      | 0.86                               | 0.76, 0.98      |
| Quintile 5 (≥411)              | 350         | 112,116             | 0.79         | 0.69, 0.91      | 0.75                               | 0.65, 0.87      |
| <b>25≤BMI&lt;30</b>            |             |                     |              |                 |                                    |                 |
| Quintile 1 (≤46)               | 213         | 40,967              | <b>1.00</b>  | <b>referent</b> | <b>1.00</b>                        | <b>referent</b> |
| Quintile 2 (47-133)            | 271         | 57,843              | 0.84         | 0.70, 1.01      | 0.81                               | 0.68, 0.97      |
| Quintile 3 (134-233)           | 255         | 50,823              | 0.90         | 0.75, 1.08      | 0.86                               | 0.72, 1.04      |
| Quintile 4 (234-410)           | 307         | 64,529              | 0.81         | 0.68, 0.97      | 0.76                               | 0.63, 0.91      |
| Quintile 5 (≥411)              | 214         | 53,186              | 0.76         | 0.63, 0.92      | 0.74                               | 0.61, 0.91      |
| <b>BMI≥30</b>                  |             |                     |              |                 |                                    |                 |
| Quintile 1 (≤46)               | 176         | 32,479              | <b>1.00</b>  | <b>referent</b> | <b>1.00</b>                        | <b>referent</b> |
| Quintile 2 (47-133)            | 310         | 49,139              | 1.09         | 0.91, 1.32      | 1.06                               | 0.88, 1.28      |
| Quintile 3 (134-233)           | 254         | 42,622              | 1.04         | 0.86, 1.26      | 1.00                               | 0.82, 1.22      |
| Quintile 4 (234-410)           | 284         | 46,102              | 1.02         | 0.85, 1.24      | 0.97                               | 0.80, 1.18      |
| Quintile 5 (≥411)              | 166         | 36,188              | 0.83         | 0.67, 1.03      | 0.82                               | 0.66, 1.02      |
| <b>P<sub>interaction</sub></b> |             |                     | 0.61         |                 |                                    |                 |

Abbreviations: CI, confidence interval; HR, hazard ratio; BMI, body mass index.

<sup>a</sup> Adjusted for age (continuous variable), race (non-Hispanic white, African-American, Asian, or other race), postmenopausal hormone use (premenopause, never, current or past users), alcohol drinking (none, <4.9, 5.0–9.9, 10–14.9, 15–29.9, or ≥30.0 g/day), smoking status (never smokers, past smokers 1-4, past smokers 5-14, past smokers 15-24, past smokers ≥25, current smokers 1-4, current smokers 5-14, current smokers 15-24, current smokers ≥25 cigarettes/day), and physical activity (metabolic equivalent in quintiles, h/wk).

**eTable 5. Association between caffeine intake and rosacea stratified by physical activity in the Nurses' Health Study II (1991–2005)**

|                                     | No. of Case | No. of Person-Years | Age-Adjusted |                 | Multivariate-Adjusted <sup>a</sup> |                 |
|-------------------------------------|-------------|---------------------|--------------|-----------------|------------------------------------|-----------------|
|                                     |             |                     | HR           | 95% CI          | HR                                 | 95% CI          |
| <b>Physical activity Quintile 1</b> |             |                     |              |                 |                                    |                 |
| Quintile 1 ( $\leq 46$ )            | 154         | 34,300              | <b>1.00</b>  | <b>referent</b> | <b>1.00</b>                        | <b>referent</b> |
| Quintile 2 (47-133)                 | 221         | 45,603              | 1.00         | 0.81, 1.23      | 0.97                               | 0.79, 1.19      |
| Quintile 3 (134-233)                | 194         | 40,558              | 1.00         | 0.81, 1.23      | 0.97                               | 0.78, 1.20      |
| Quintile 4 (234-410)                | 221         | 45,355              | 0.96         | 0.78, 1.19      | 0.94                               | 0.76, 1.16      |
| Quintile 5 ( $\geq 411$ )           | 173         | 43,083              | 0.87         | 0.70, 1.08      | 0.89                               | 0.71, 1.12      |
| <b>Physical activity Quintile 2</b> |             |                     |              |                 |                                    |                 |
| Quintile 1 ( $\leq 46$ )            | 186         | 36,654              | <b>1.00</b>  | <b>referent</b> | <b>1.00</b>                        | <b>referent</b> |
| Quintile 2 (47-133)                 | 240         | 47,524              | 0.91         | 0.75, 1.10      | 0.87                               | 0.72, 1.06      |
| Quintile 3 (134-233)                | 221         | 42,139              | 0.95         | 0.78, 1.16      | 0.90                               | 0.74, 1.10      |
| Quintile 4 (234-410)                | 232         | 49,311              | 0.82         | 0.67, 0.99      | 0.76                               | 0.62, 0.93      |
| Quintile 5 ( $\geq 411$ )           | 116         | 39,949              | 0.57         | 0.45, 0.72      | 0.56                               | 0.44, 0.72      |
| <b>Physical activity Quintile 3</b> |             |                     |              |                 |                                    |                 |
| Quintile 1 ( $\leq 46$ )            | 182         | 38,170              | <b>1.00</b>  | <b>referent</b> | <b>1.00</b>                        | <b>referent</b> |
| Quintile 2 (47-133)                 | 222         | 47,871              | 0.90         | 0.74, 1.09      | 0.85                               | 0.70, 1.03      |
| Quintile 3 (134-233)                | 202         | 42,660              | 0.93         | 0.76, 1.13      | 0.85                               | 0.69, 1.04      |
| Quintile 4 (234-410)                | 239         | 51,204              | 0.88         | 0.72, 1.06      | 0.77                               | 0.63, 0.94      |
| Quintile 5 ( $\geq 411$ )           | 143         | 38,314              | 0.78         | 0.63, 0.97      | 0.71                               | 0.56, 0.89      |
| <b>Physical activity Quintile 4</b> |             |                     |              |                 |                                    |                 |
| Quintile 1 ( $\leq 46$ )            | 168         | 38,631              | <b>1.00</b>  | <b>referent</b> | <b>1.00</b>                        | <b>referent</b> |
| Quintile 2 (47-133)                 | 206         | 47,126              | 0.94         | 0.77, 1.15      | 0.88                               | 0.71, 1.08      |
| Quintile 3 (134-233)                | 195         | 42,257              | 0.99         | 0.81, 1.22      | 0.90                               | 0.73, 1.10      |
| Quintile 4 (234-410)                | 266         | 52,942              | 1.03         | 0.85, 1.25      | 0.89                               | 0.73, 1.09      |
| Quintile 5 ( $\geq 411$ )           | 151         | 36,380              | 0.93         | 0.75, 1.16      | 0.82                               | 0.65, 1.03      |
| <b>Physical activity Quintile 5</b> |             |                     |              |                 |                                    |                 |
| Quintile 1 ( $\leq 46$ )            | 130         | 37,801              | <b>1.00</b>  | <b>referent</b> | <b>1.00</b>                        | <b>referent</b> |
| Quintile 2 (47-133)                 | 170         | 44,539              | 1.04         | 0.83, 1.31      | 1.01                               | 0.80, 1.27      |
| Quintile 3 (134-233)                | 169         | 41,596              | 1.08         | 0.86, 1.36      | 1.03                               | 0.82, 1.30      |
| Quintile 4 (234-410)                | 217         | 52,256              | 1.06         | 0.85, 1.32      | 0.99                               | 0.79, 1.24      |
| Quintile 5 ( $\geq 411$ )           | 119         | 36,859              | 0.91         | 0.71, 1.17      | 0.89                               | 0.69, 1.15      |
| $P_{\text{interaction}}$            |             |                     | 0.33         |                 |                                    |                 |

Abbreviations: CI, confidence interval; HR, hazard ratio; BMI, body mass index.

<sup>a</sup> Adjusted for age (continuous variable), race (non-Hispanic white, African-American, Asian, or other race), postmenopausal hormone use (premenopause, never, current or past users), alcohol drinking (none, <4.9, 5.0–9.9, 10–14.9, 15–29.9, or  $\geq 30.0$  g/day), smoking status (never smokers, past smokers 1-4, past smokers 5-14, past smokers 15-24, past smokers  $\geq 25$ , current smokers 1-4, current smokers 5-14, current smokers 15-24, current smokers  $\geq 25$  cigarettes/day), and body mass index (continuous variable).

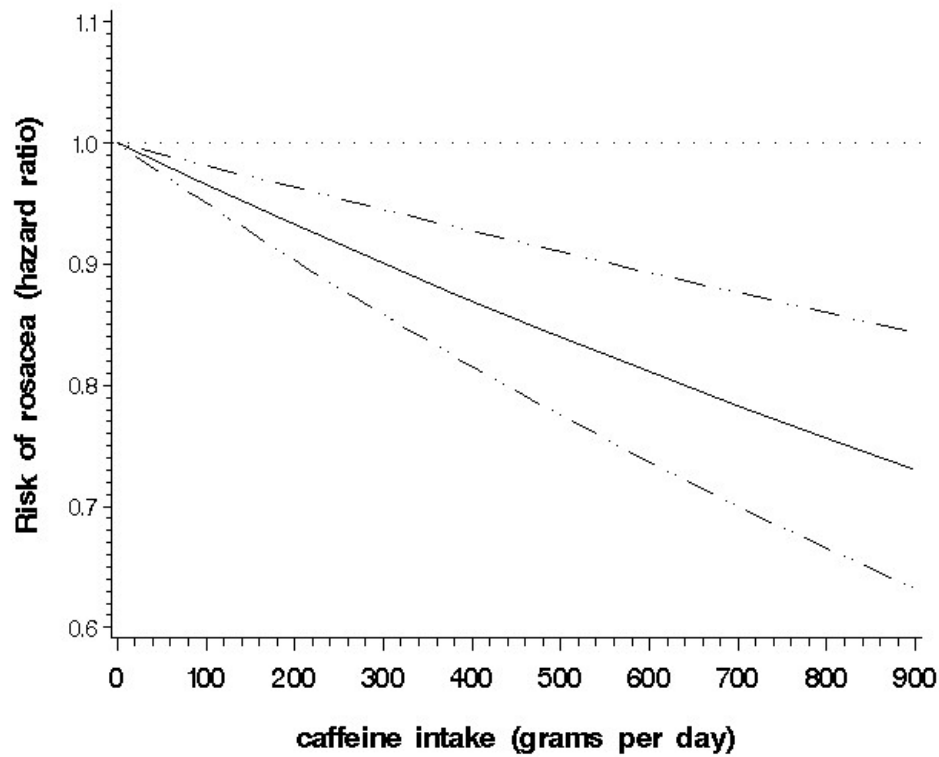

**eFigure 1. Dose-response hazard ratio (with 95% CI) of incident rosacea by caffeine intake.**

Model was adjusted for age (continuous variable), race (non-Hispanic white, African-American, Asian, or other race), postmenopausal hormone use (premenopause, never, current or past users), alcohol drinking (none, <4.9, 5.0–9.9, 10–14.9, 15–29.9, or  $\geq 30.0$  g/day), smoking status (never smokers, past smokers 1-4, past smokers 5-14, past smokers 15-24, past smokers  $\geq 25$ , current smokers 1-4, current smokers 5-14, current smokers 15-24, current smokers  $\geq 25$  cigarettes/day), body mass index (continuous variable), and physical activity (metabolic equivalent hours/week in quintiles). Solid line represents point estimates and dashed lines represent 95% CI.
